# Supplementary material for: Age-dependent effects of water striders moving on perturbed water surfaces
Source: Oxford University Press journal article supplement (doi:10.1242/jeb.157172), 2017-01-01
Supplement: jeb157172supp.pdf [file jeb157172supp.pdf]

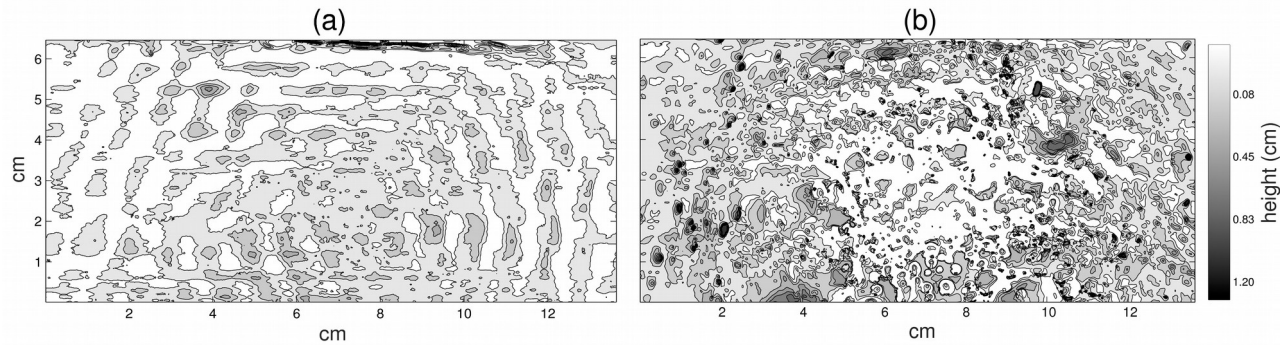

Figure S1. Representative contour plots of instantaneous heights for wave-dominated (A) and bubble-dominated (B) surfaces. Height was derived from values of greyscale using measurements of maximal and minimal surface heights obtained from a lateral video recording ( $\text{height} = -0.007483299 \times [\text{greyscale value}] + 1.57429$ ).

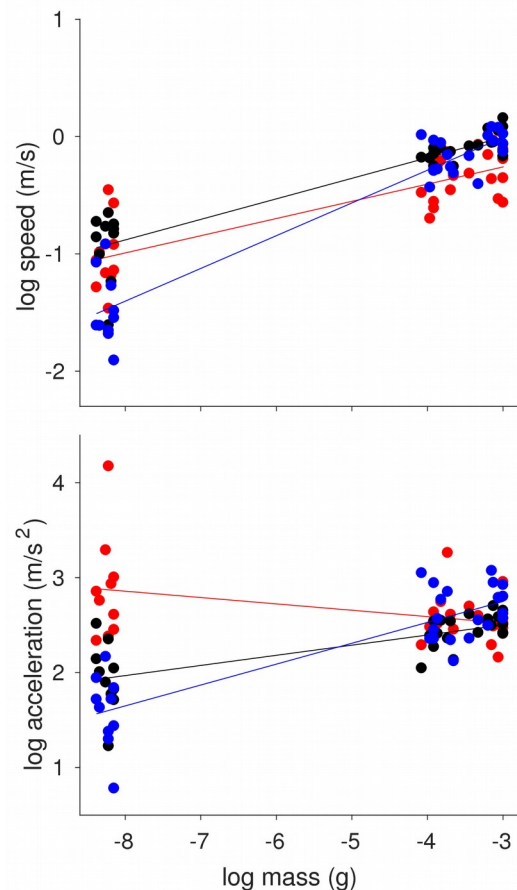

Figure S2. Log-log plot of peak jumping speed (A) and average acceleration (B) versus body mass for three age-classes of water striders jumping from smooth (black), wave-dominated (blue) and bubble-dominated (red) conditions. Units of speed, acceleration, and mass are in m/s,  $\text{m/s}^2$ , and grams, respectively. Results of linear regressions as follows: speed on smooth surface,  $Y=0.175X+0.519$ ,  $r^2=0.838$ ,  $F(1,28)=144.9$ ,  $p<0.001$ ; acceleration on smooth surface,  $Y=0.107X+2.8$ ,  $r^2=0.52$ ,  $F(1,28)=30.7$ ,  $p<0.001$ ; speed on wave-dominated surface,  $Y=0.279X+0.830$ ,  $r^2=0.52$ ,  $F(1,28)=30.7$ ,  $p<0.001$ .

squared=0.91,  $F(1,28)=267.4$   $p<0.001$ ; acceleration on wave-dominated surface,  $Y=0.220X+3.41$ ,  $r^2=0.73$ ,  $F(1,28)=74.9$   $p<0.001$ ; speed on wave-dominated surface,  $Y=0.147X+0.181$ ,  $r^2=0.69$ ,  $F(1,28)=61.6$   $p<0.001$ ; acceleration on bubble-dominated surface,  $Y=-0.067X+2.323$ ,  $r^2=0.15$ ,  $F(1,28)=5.1$   $p=0.03$ ). Data represents the mean $\pm$ s.e.m. The sample size  $n$  for each condition was 10. Each individual was exposed once to each experimental condition.

## Movies

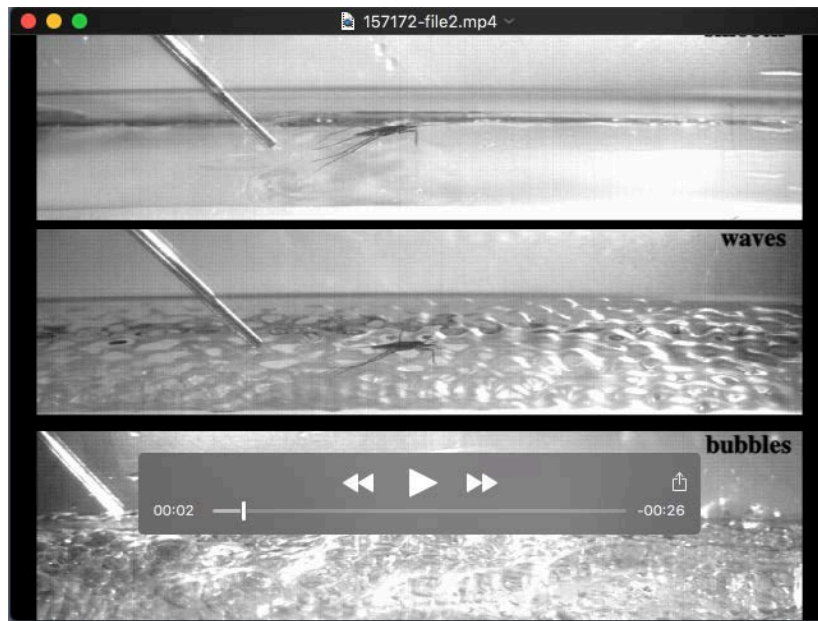

Movie 1. (Three age-classes of water strider jumping from a smooth [top panel], wave-dominated [middle panel] and bubble-dominated [bottom panel] water surface.)

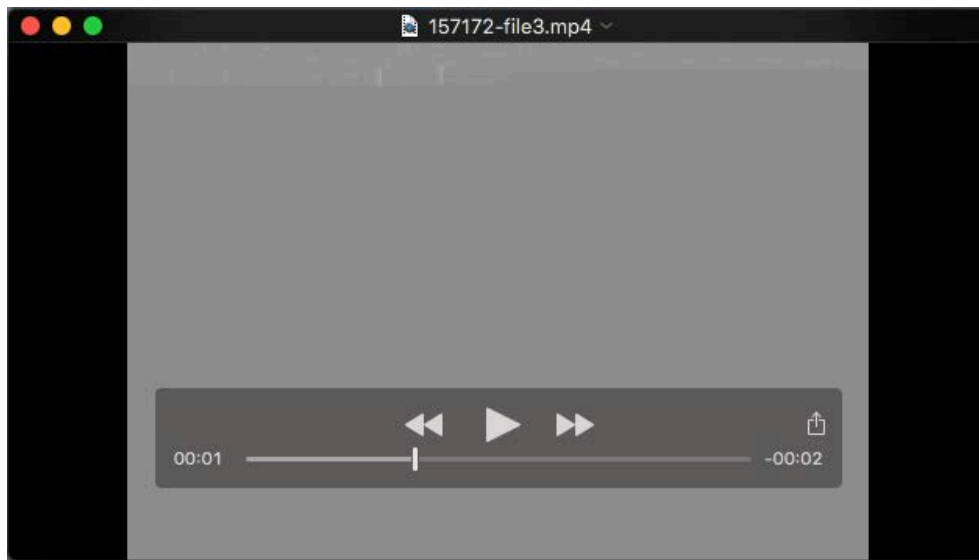

Movie 2. (Styrofoam ball ejected by a bursting bubble)

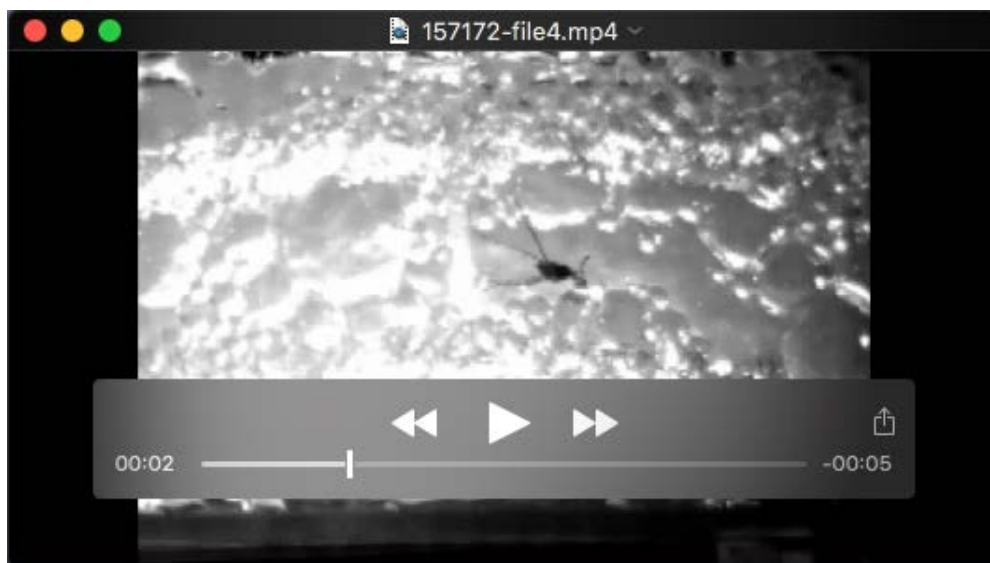

Movie 3. (Juvenile water strider submerging beneath a bubble-dominated water surface)
